# Supplementary figures and images for: In Vitro Effects of Lactobacillus plantarum LN66 and Antibiotics Used Alone or in Combination on Helicobacter pylori Mature Biofilm
Source: MDPI journal article supplement (doi:10.3390/microorganisms9020424), 2021-02-18

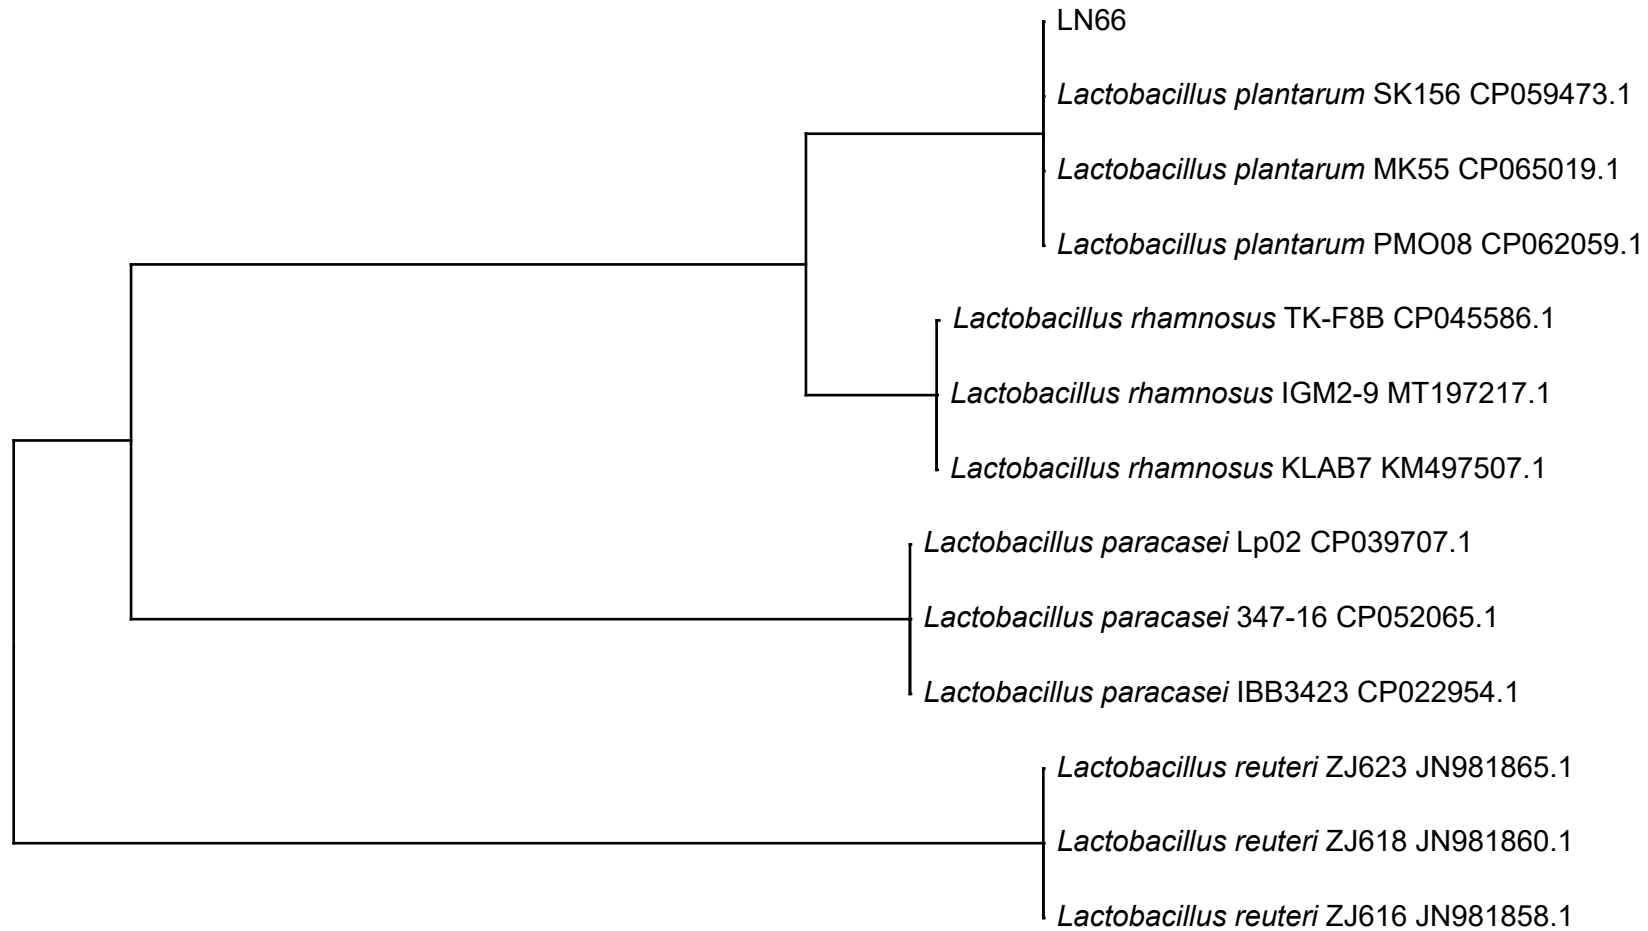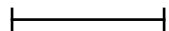

Supplement: s1 [file s1]

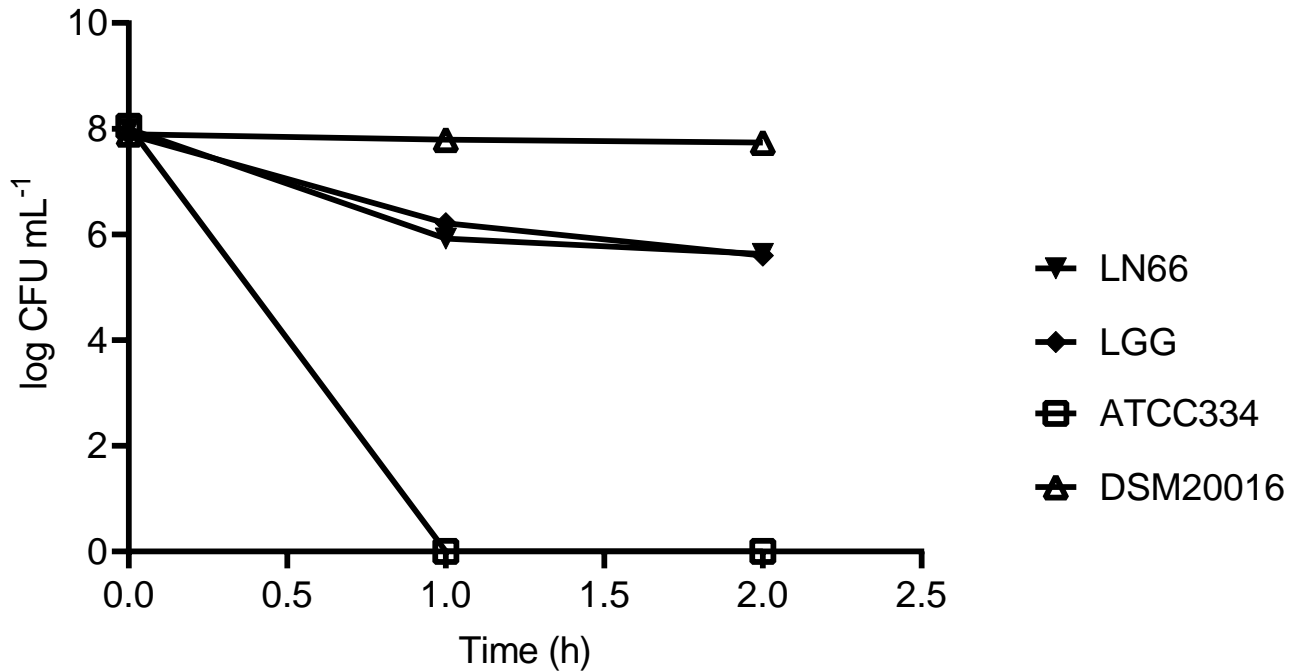

Supplement: s1 [file s1]

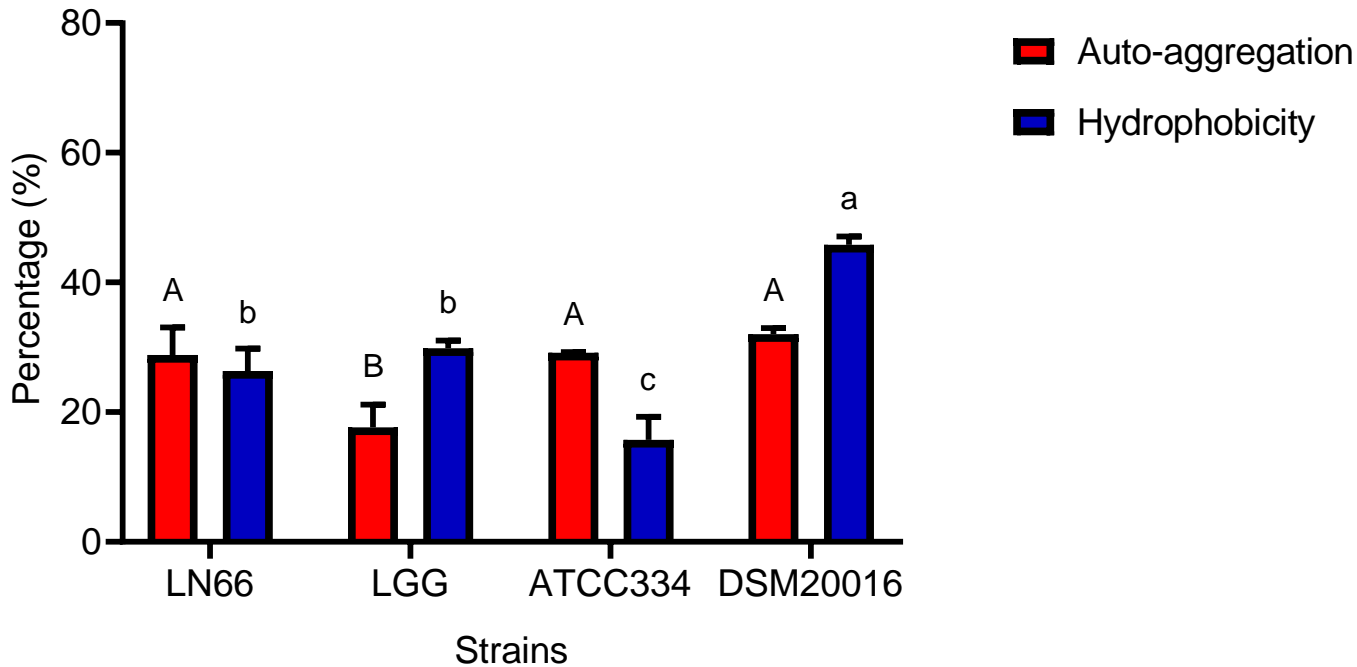

Supplement: s1 [file s1]
